# Supplementary material for: Cellular Dynamics and Genomic Identity of Centromeres in Cereal Blast Fungus
Source: PubMed Central journal article supplement (PMC6667624; doi:10.1128/mbio.01581-19), 2019-07-30

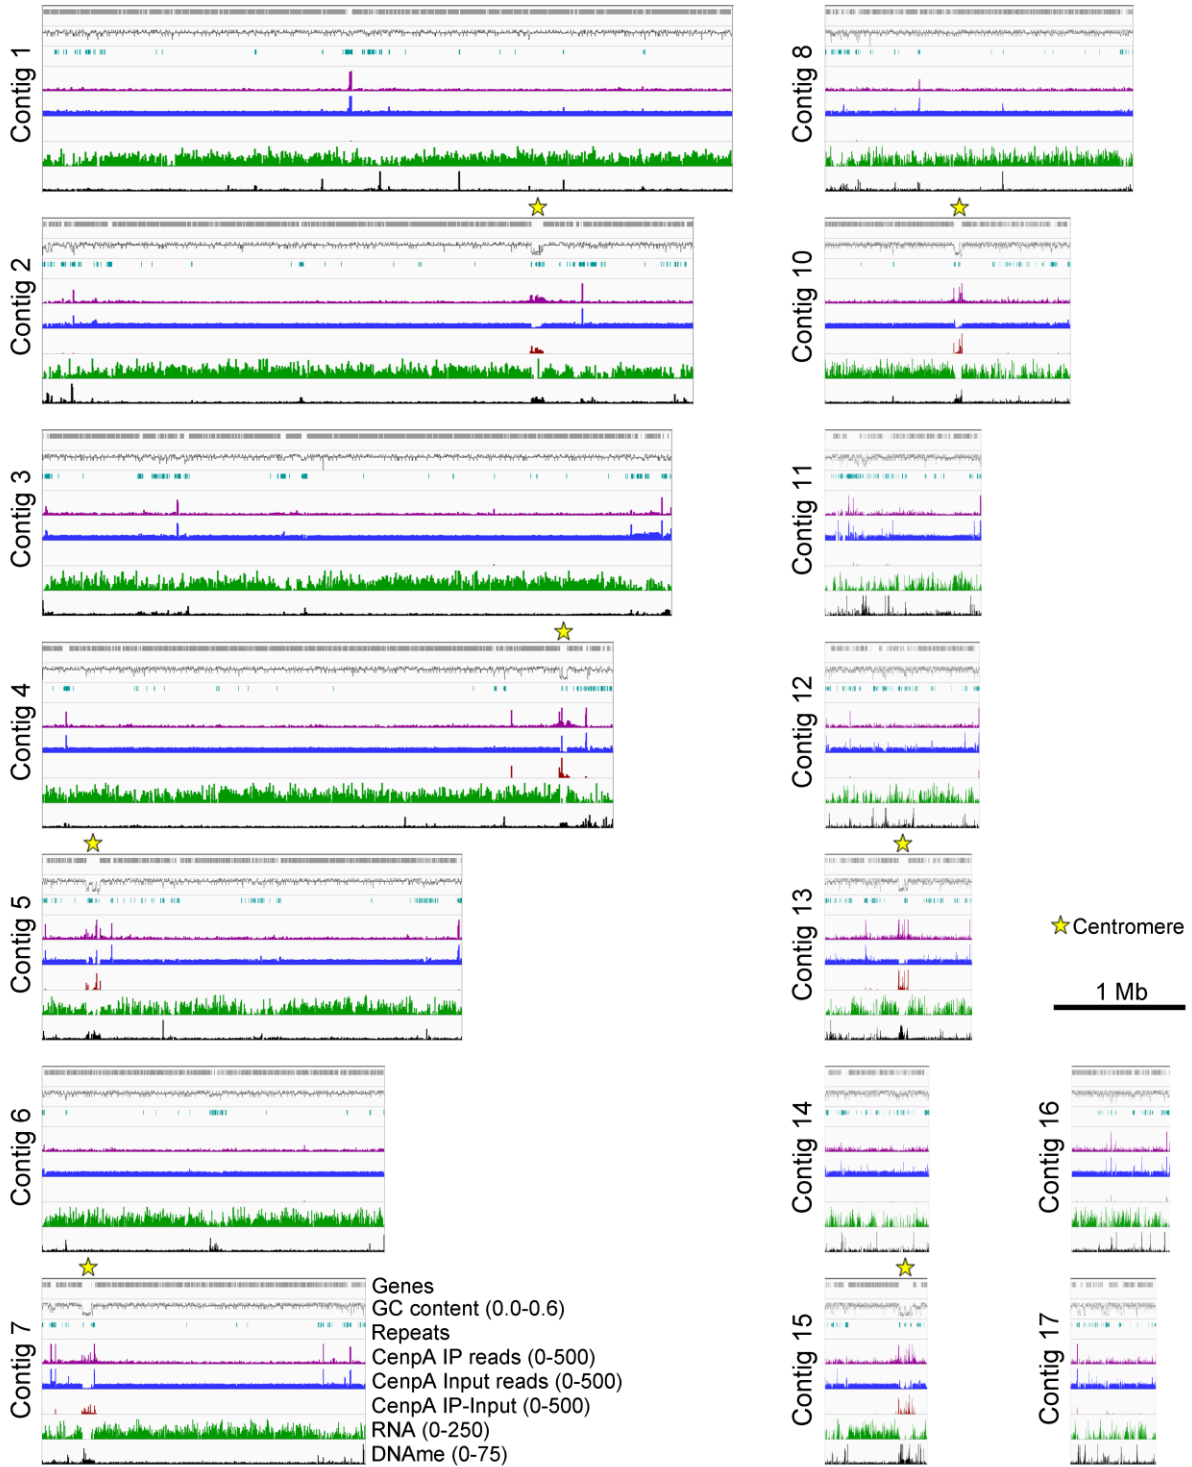

Contig 1

Contig 2

Contig 3

Contig 4

Contig 5

Contig 6

Contig 7

Contig 8

Contig 10

Contig 11

Contig 12

Contig 13

Contig 14

Contig 15

Contig 16

Contig 17

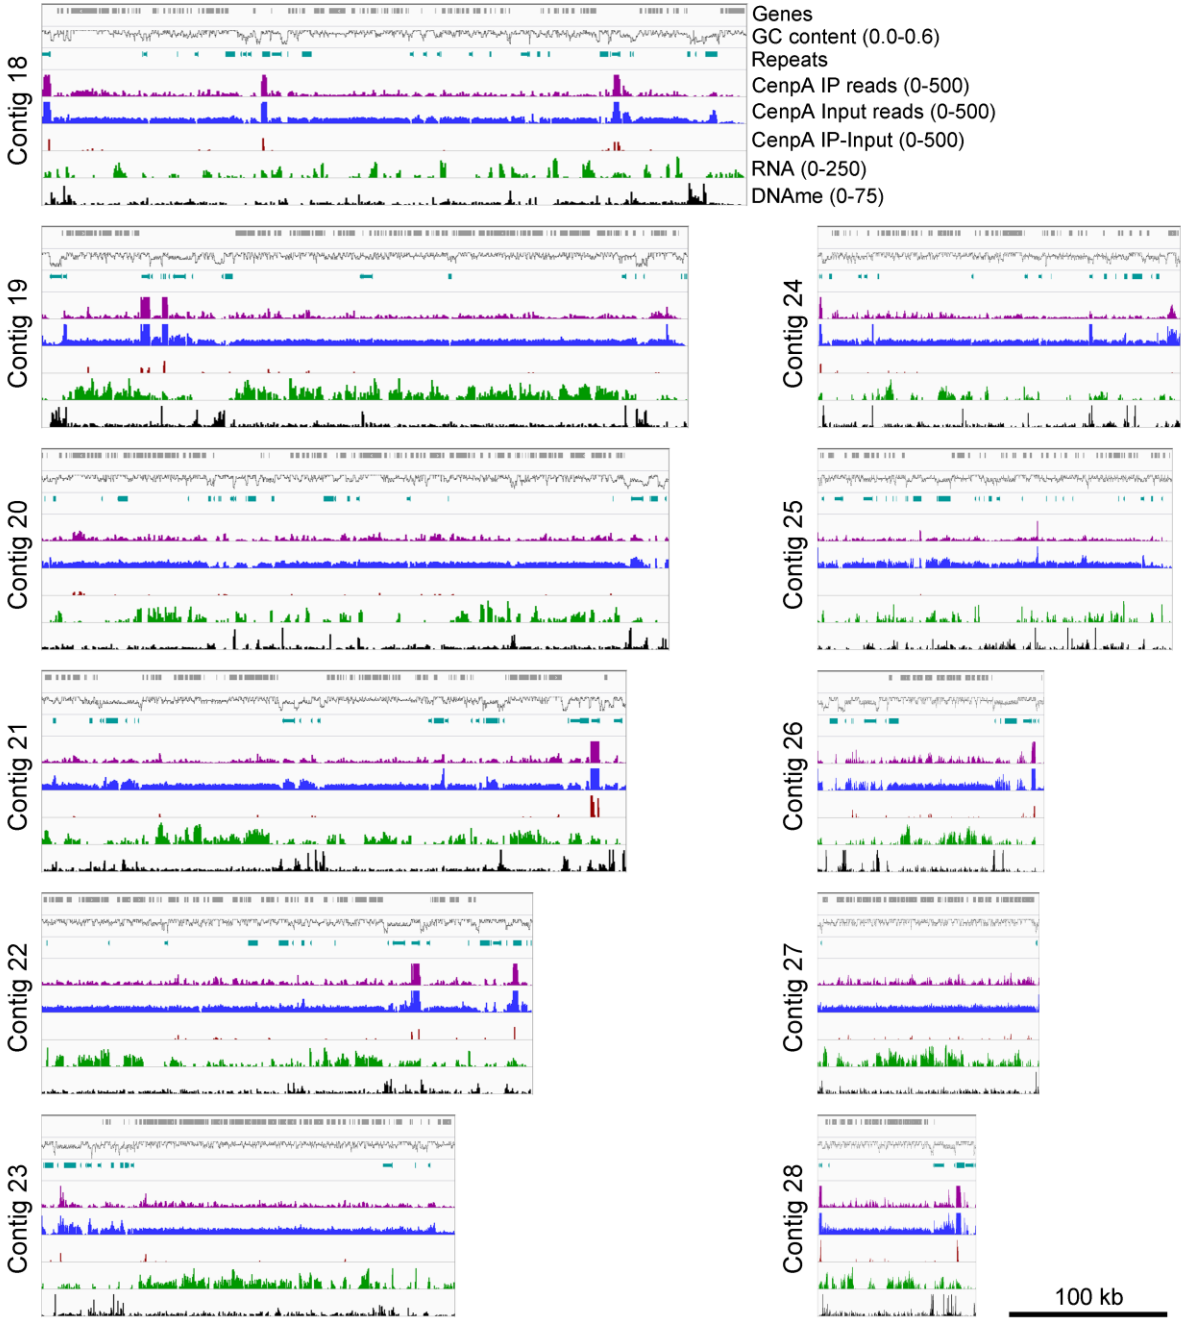

Supplement: mBio.01581-19-sf003.pdf [file mBio.01581-19-sf003.pdf]
